# Supplementary material for: Prevalence and Associated Factors of optrA-Positive-Enterococcus faecalis in Different Reservoirs around Farms in Vietnam
Source: MDPI journal article supplement (doi:10.3390/antibiotics12060954), 2023-05-24
Supplement: s1 [file s1]

Supplemental Table 1. Resistance patterns of *E. faecalis* isolates

| No. exhibiting antimicrobial resistance | Resistance patterns                 | No. of isolates                    |             |                                  |            |
|-----------------------------------------|-------------------------------------|------------------------------------|-------------|----------------------------------|------------|
|                                         |                                     | <i>optrA</i> positive<br>(n = 186) |             | <i>optrA</i> negative<br>(n=150) |            |
|                                         |                                     | n                                  | %           | n                                | %          |
| 10                                      | E-TE-MN-DXT-C-HLGR-HLST-CIP-LEV-LNZ | 2                                  | 1.1         | 0                                | 0.0        |
|                                         | <b>Total</b>                        | <b>2</b>                           | <b>1.1</b>  | <b>0</b>                         | <b>0.0</b> |
| 9                                       | E-TE-DXT-C-HLGR-HLSR-CIP-LEV-LNZ    | 1                                  | 0.5         | 0                                | 0.0        |
|                                         | E-TE-MN-C-HLGR-HLSR-CIP-LEV-LNZ     | 1                                  | 0.5         | 0                                | 0.0        |
|                                         | E-TE-MN-DXT-C-HLGR-CIP-LEV-LNZ      | 1                                  | 0.5         | 0                                | 0.0        |
|                                         | E-TE-MN-DXT-C-HLGR-HLSR-CIP-LNZ     | 3                                  | 1.6         | 0                                | 0.0        |
|                                         | E-TE-MN-DXT-C-HLSR-CIP-LEV-LNZ      | 13                                 | 7.0         | 0                                | 0.0        |
|                                         | <b>Total</b>                        | <b>19</b>                          | <b>10.2</b> | <b>0</b>                         | <b>0.0</b> |
| 8                                       | E-TE-DXT-C-HLGR-HLSR-CIP-LEV        | 1                                  | 0.5         | 0                                | 0.0        |
|                                         | E-TE-DXT-C-HLGR-HLSR-CIP-LNZ        | 1                                  | 0.5         | 0                                | 0.0        |
|                                         | E-TE-DXT-C-HLSR-CIP-LEV-LNZ         | 3                                  | 1.6         | 0                                | 0.0        |
|                                         | E-TE-MN-C-HLSR-CIP-LEV-LNZ          | 1                                  | 0.5         | 0                                | 0.0        |
|                                         | E-TE-MN-DXT-C-CIP-LEV-LNZ           | 8                                  | 4.3         | 0                                | 0.0        |
|                                         | E-TE-MN-DXT-C-HLGR-CIP-LNZ          | 0                                  | 0.0         | 1                                | 0.7        |
|                                         | E-TE-MN-DXT-C-HLGR-HLSR-LNZ         | 8                                  | 4.3         | 0                                | 0.0        |
|                                         | E-TE-MN-DXT-C-HLSR-CIP-LNZ          | 3                                  | 1.6         | 0                                | 0.0        |
|                                         | <b>Total</b>                        | <b>25</b>                          | <b>13.4</b> | <b>1</b>                         | <b>0.7</b> |
| 7                                       | E-TE-C-HLGR-CIP-LEV-LNZ             | 1                                  | 0.5         | 0                                | 0.0        |
|                                         | E-TE-C-HLSR-CIP-LEV-LNZ             | 1                                  | 0.5         | 0                                | 0.0        |
|                                         | E-TE-DXT-C-CIP-LEV-LNZ              | 1                                  | 0.5         | 0                                | 0.0        |
|                                         | E-TE-MN-DXT-C-CIP-LNZ               | 2                                  | 1.1         | 0                                | 0.0        |
|                                         | E-TE-MN-DXT-C-HLGR-LNZ              | 4                                  | 2.2         | 0                                | 0.0        |
|                                         | E-TE-MN-DXT-C-HLGR-HLSR             | 1                                  | 0.5         | 1                                | 0.7        |
|                                         | E-TE-MN-DXT-C-HLSR-CIP              | 0                                  | 0           | 1                                | 0.7        |
|                                         | E-TE-MN-DXT-C-HLSR-LNZ              | 21                                 | 11.3        | 0                                | 0.0        |
|                                         | E-TE-MN-DXT-HLGR-HLSR-LNZ           | 3                                  | 1.6         | 0                                | 0.0        |
|                                         | <b>Total</b>                        | <b>34</b>                          | <b>18.3</b> | <b>2</b>                         | <b>1.3</b> |
| 6                                       | E-TE-DXT-C-CIP-LEV                  | 0                                  | 0.0         | 1                                | 0.7        |
|                                         | E-TE-DXT-C-HLGR-LNZ                 | 1                                  | 0.5         | 0                                | 0.0        |
|                                         | E-TE-DXT-C-HLSR-LNZ                 | 4                                  | 2.2         | 0                                | 0.0        |
|                                         | E-TE-DXT-HLGR-HLSR-LNZ              | 1                                  | 0.5         | 0                                | 0.0        |

|   |                       |           |             |           |             |
|---|-----------------------|-----------|-------------|-----------|-------------|
|   | E-TE-MN-DXT-C-CIP     | 2         | 1.1         | 1         | 0.7         |
|   | E-TE-MN-DXT-C-LEV     | 0         | 0.0         | 1         | 0.7         |
|   | E-TE-MN-DXT-C-LNZ     | 31        | 16.1        | 2         | 1.3         |
|   | E-TE-MN-DXT-C-HLSR    | 1         | 0.5         | 5         | 3.3         |
|   | E-TE-MN-DXT-HLGR-HLSR | 0         | 0.0         | 1         | 0.7         |
|   | E-TE-MN-DXT-HLSR-LNZ  | 2         | 1.1         | 0         | 0.0         |
|   | TE-MN-DXT-C-CIP-LNZ   | 1         | 0.5         | 0         | 0.0         |
|   | TE-MN-DXT-C-HLSR-LNZ  | 1         | 0.5         | 0         | 0.0         |
|   | <b>Total</b>          | <b>44</b> | <b>23.7</b> | <b>11</b> | <b>7.3</b>  |
| 5 | E-TE-C-CIP-LEV        | 1         | 0.5         | 1         | 0.7         |
|   | E-TE-DXT-C-LNZ        | 11        | 5.9         | 0         | 0.0         |
|   | E-TE-DXT-C-HLSR       | 1         | 0.5         | 0         | 0.0         |
|   | E-TE-HLGR-HLSR-LNZ    | 1         | 0.5         | 0         | 0.0         |
|   | E-TE-MN-C-HLGR        | 0         | 0.0         | 1         | 0.7         |
|   | E-TE-MN-DXT-C         | 8         | 4.3         | 9         | 6.0         |
|   | E-TE-MN-DXT-LNZ       | 3         | 1.6         | 0         | 0.0         |
|   | E-TE-MN-DXT-HLSR      | 1         | 0.5         | 1         | 0.7         |
|   | TE-MN-DXT-C-LEV       | 1         | 0.5         | 0         | 0.0         |
|   | TE-MN-DXT-C-LNZ       | 1         | 0.5         | 0         | 0.0         |
|   | TE-MN-DXT-HLSR-LNZ    | 1         | 0.5         | 0         | 0.0         |
|   | <b>Total</b>          | <b>29</b> | <b>15.6</b> | <b>12</b> | <b>8.0</b>  |
| 4 | E-TE-C-LNZ            | 1         | 0.5         | 0         | 0.0         |
|   | E-TE-DXT-C            | 1         | 0.5         | 6         | 4.0         |
|   | E-TE-DXT-HLSR         | 0         | 0           | 1         | 0.7         |
|   | E-TE-MN-DXT           | 1         | 0.5         | 16        | 10.7        |
|   | E-TE-HLSR-LNZ         | 1         | 0.5         | 0         | 0.0         |
|   | TE-DXT-C-LNZ          | 2         | 1.1         | 0         | 0.0         |
|   | TE-MN-DXT-C           | 0         | 0.0         | 3         | 2.0         |
|   | TE-MN-DXT-HLGR        | 0         | 0.0         | 1         | 0.7         |
|   | TE-MN-DXT-LNZ         | 7         | 3.8         | 1         | 0.7         |
|   | TE-MN-DXT-HLSR        | 0         | 0.0         | 2         | 1.3         |
|   | <b>Total</b>          | <b>13</b> | <b>7.0</b>  | <b>30</b> | <b>20.0</b> |
| 3 | C-HLGR-LNZ            | 1         | 0.5         | 0         | 0.7         |
|   | DXT-C-LNZ             | 1         | 0.5         | 0         | 0.7         |
|   | E-TE-DXT              | 0         | 0.0         | 1         | 0.0         |
|   | HLGR-HLSR-LNZ         | 2         | 1.1         | 0         | 1.3         |
|   | TE-DXT-C              | 0         | 0.0         | 3         | 0.0         |
|   | TE-DXT-LNZ            | 1         | 0.5         | 0         | 0.7         |

|     |              |            |             |           |             |
|-----|--------------|------------|-------------|-----------|-------------|
|     | TE-MN-DXT    | 1          | 0.5         | 25        | 0.7         |
|     | TE-MN-LNZ    | 1          | 0.5         | 0         | 0.7         |
|     | <b>Total</b> | <b>7</b>   | <b>3.8</b>  | <b>29</b> | <b>19.3</b> |
| 2   | E-C          | 0          | 0.0         | 1         | 0.7         |
|     | E-LNZ        | 0          | 0.0         | 1         | 0.7         |
|     | E-TE         | 0          | 0.0         | 3         | 2.0         |
|     | HLGR-LNZ     | 1          | 0.5         | 0         | 0.0         |
|     | HLSR-LNZ     | 2          | 1.1         | 0         | 0.0         |
|     | TE-DXT       | 1          | 0.5         | 11        | 7.3         |
|     | TE-LNZ       | 2          | 1.1         | 0         | 0.0         |
|     | TE-MN        | 0          | 0.0         | 3         | 2.0         |
|     | <b>Total</b> | <b>6</b>   | <b>3.2</b>  | <b>19</b> | <b>12.7</b> |
| 1   | CIP          | 0          | 0.0         | 1         | 0.7         |
|     | DXT          | 0          | 0.0         | 2         | 1.3         |
|     | LNZ          | 5          | 2.7         | 0         | 0.0         |
|     | TE           | 0          | 0.0         | 14        | 9.3         |
|     | <b>Total</b> | <b>5</b>   | <b>2.7</b>  | <b>17</b> | <b>11.3</b> |
| 0   |              | <b>2</b>   | <b>1.1</b>  | <b>29</b> | <b>19.3</b> |
| MDR |              | <b>160</b> | <b>86.0</b> | <b>37</b> | <b>24.7</b> |

(TE: tetracyclin, MN: minocyclin, DXT: doxycyclin, E: erythromycin, C: chloramphenicol, CIP: ciprofloxacin, LEV: levofloxacin, HLGR: high level gentamicin resistance, HLSR: high level streptomycin resistance, LNZ: linezolid)
